# Supplementary material
Source: MDPI journal article supplement (https://www.mdpi.com/2075-4701/14/2/215)
Supplement: s1 [file s1 › metals-2823160-supplementary.pdf]

## SUPPLEMENTARY MATERIAL

### **Effect of microstructure on the precipitation of $\beta$ -Mg<sub>2</sub>Si during cooling after homogenization of Al-Mg-Si alloys**

Hennum, E. <sup>1</sup>; Marthinsen, K.<sup>1</sup>; Tundal, U.H.<sup>2</sup>

<sup>1</sup>Norwegian University of Science and Technology, N-7491 Trondheim, Norway

<sup>2</sup>Hydro Aluminium AS, N-6601 Sunndalsøra, Norway

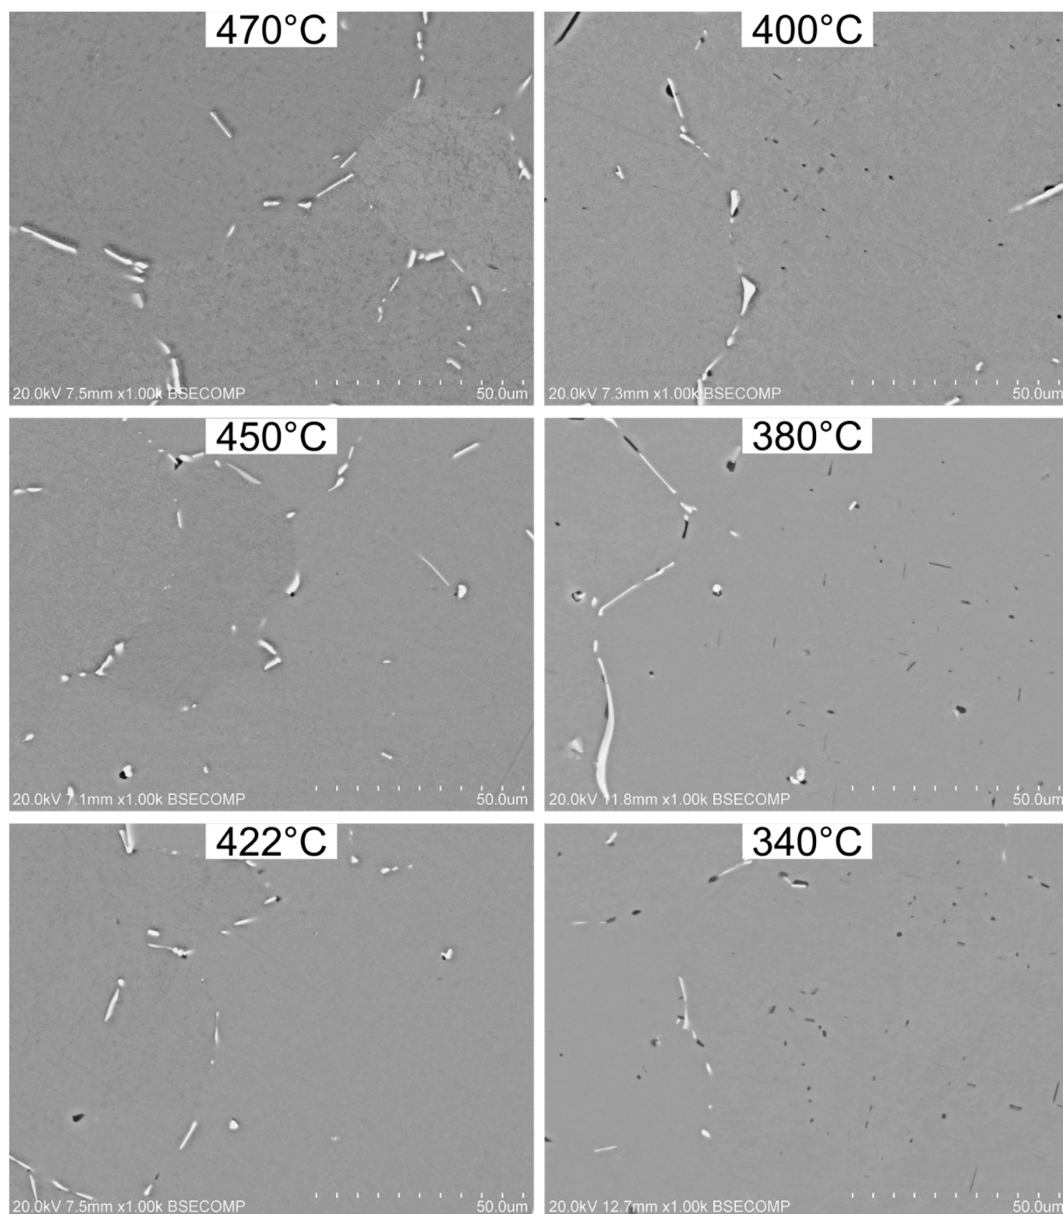

**Figure S1:** SEM micrographs of the  $\beta$ -Mg<sub>2</sub>Si particle structure at different temperatures during cooling 1K/min in alloy FE-20-203 (0.20 wt.% iron). The  $\beta$ -Mg<sub>2</sub>Si phases are dark, and the primary Al-Fe-Si phases are bright.

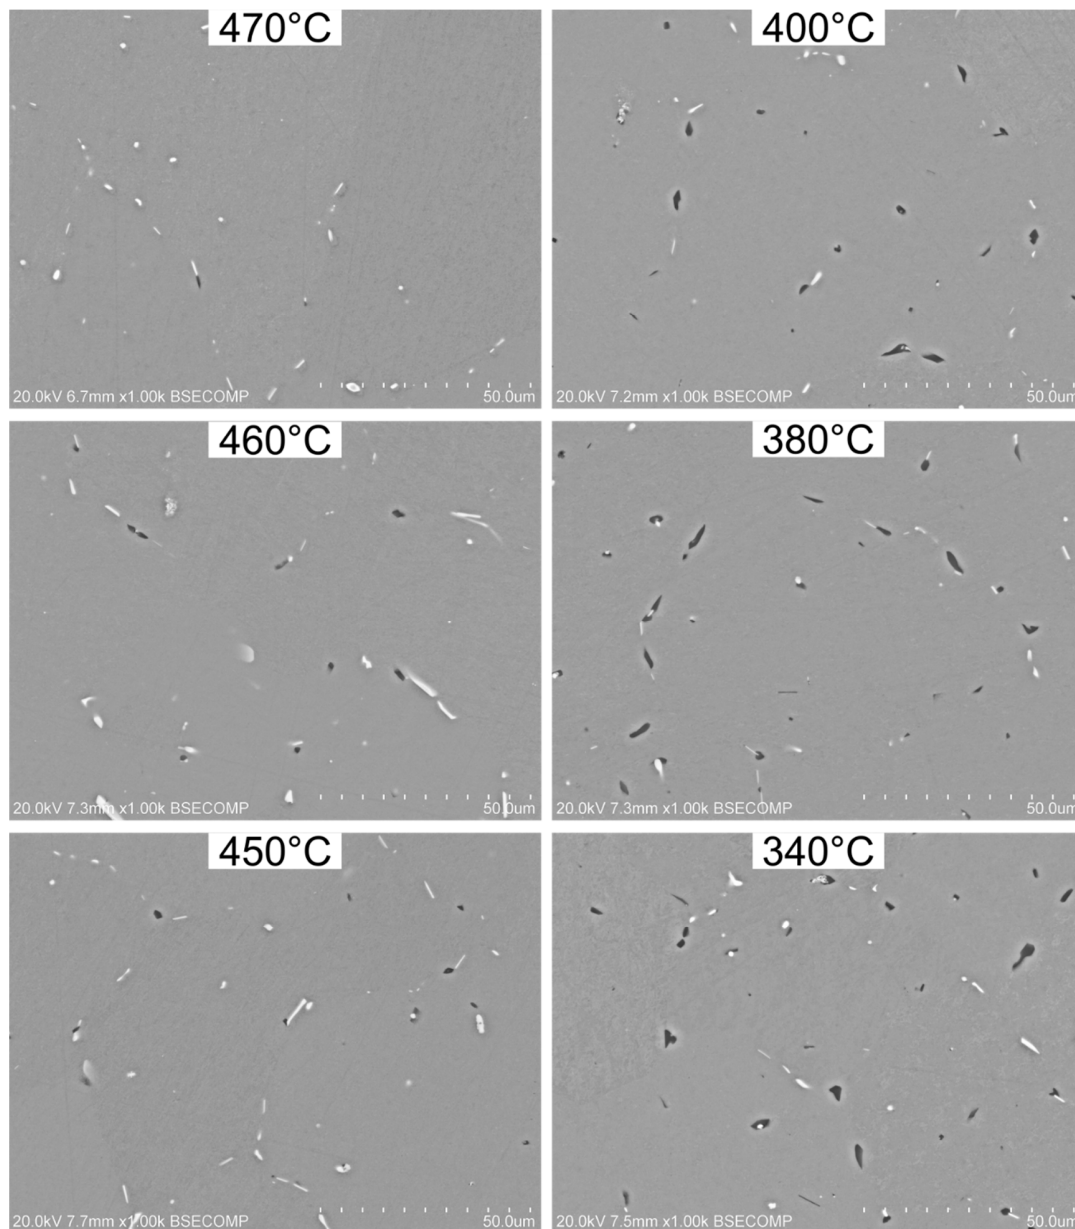

**Figure S2:** SEM micrographs of the  $\beta$ -Mg<sub>2</sub>Si particle structure at different temperatures during cooling 1K/min in alloy FE-12-95 (0.12 wt.% iron). The  $\beta$ -Mg<sub>2</sub>Si phases are dark, and the primary Al-Fe-Si phases are bright.

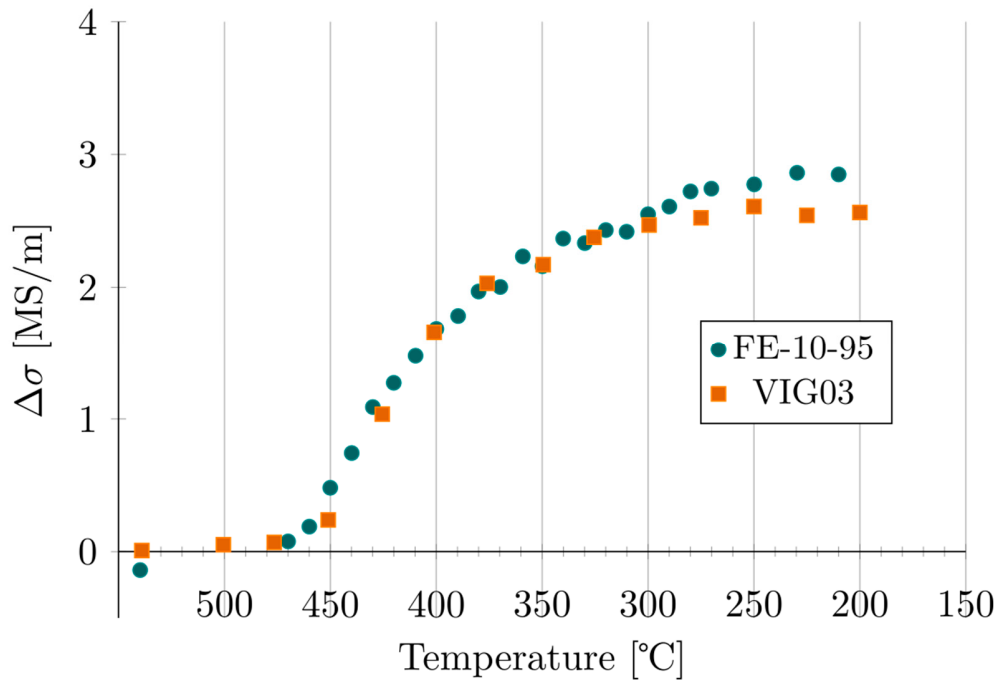

**Figure S3:** Change in electrical conductivity vs. temperature during cooling 1 K/min for alloy FE-12-95 and VIG03.

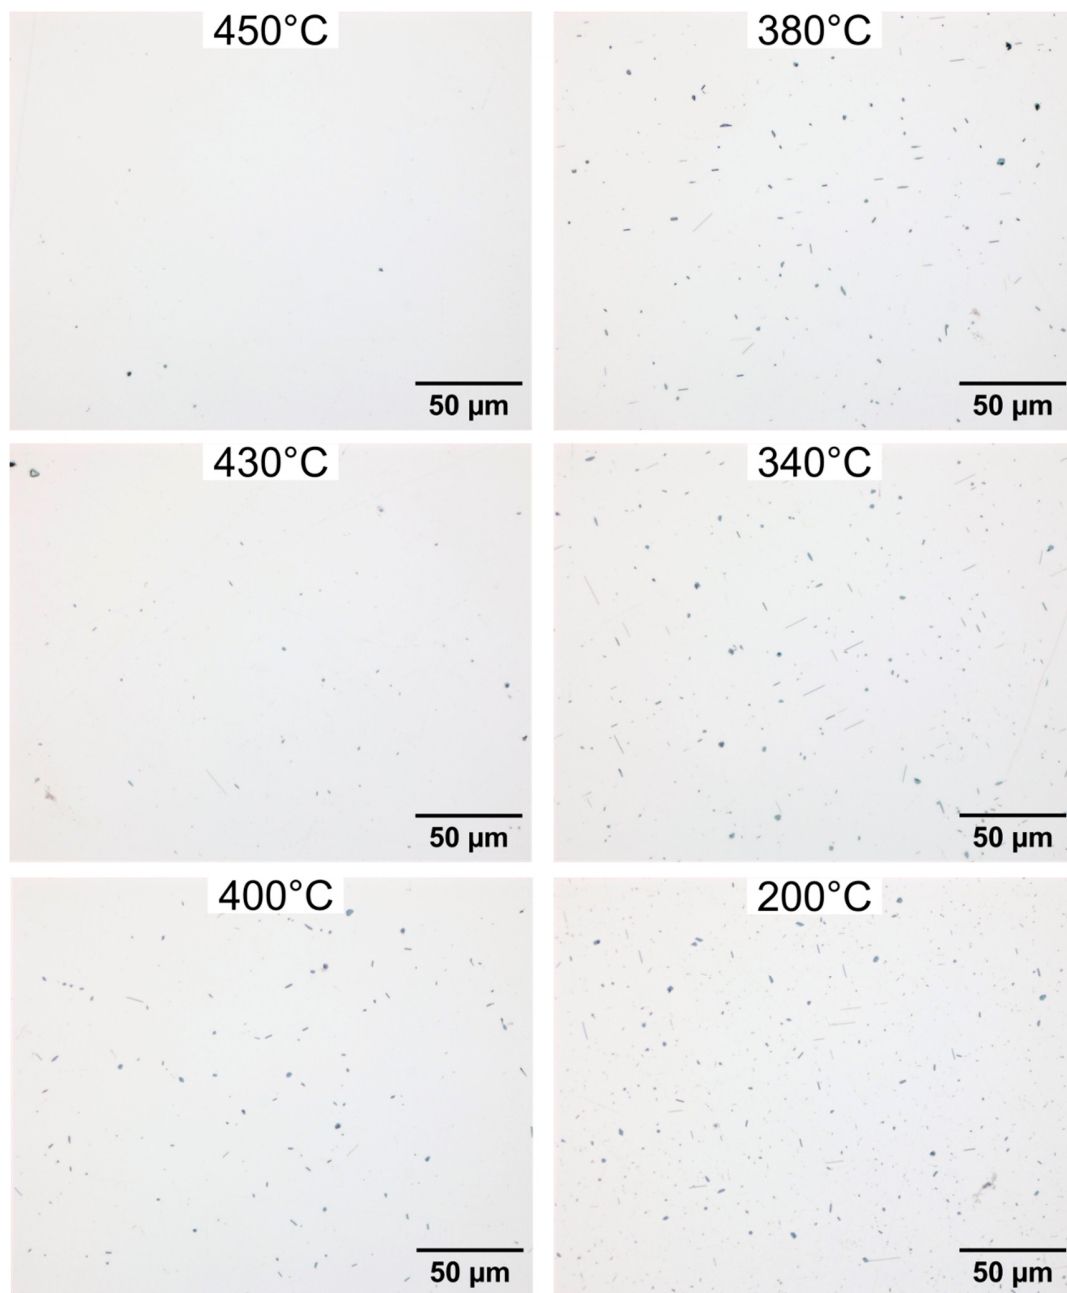

**Figure S4:** LOM micrographs of samples cooled to different temperatures at 1 K/min for the iron free alloy FE-00-95.
